# Supplementary material for: Spectroscopic investigation of the solvated MAPbI 3 transition to perovskite crystals: a temperature-dependent Raman study
Source: Royal Society of Chemistry journal article supplement (doi:10.1039/d5cp04336k), 2025-12-01
Supplement: d5cp04336k1.pdf [file d5cp04336k1.pdf]

## Supplementary Information

# **Spectroscopic investigation of the solvated MAPbI<sub>3</sub> transition to perovskite crystals: A temperature-dependent Raman study**

Abdul Zeeshan Khan<sup>a</sup>, Muhammad Shafi<sup>b</sup>, Tarek. A. Kandiel <sup>a,c,\*</sup>, Abdulaziz A. Al-Saadi <sup>a,b,\*</sup>

<sup>a</sup>Department of Chemistry, King Fahd University of Petroleum & Minerals (KFUPM), Dhahran, 31261, Saudi Arabia.

<sup>b</sup>Interdisciplinary Research Center for Refining and Advanced Chemicals (IRC-RAC), King Fahd University of Petroleum & Minerals (KFUPM), Dhahran 31261, Saudi Arabia

<sup>c</sup>Interdisciplinary Research Center for Hydrogen Technologies and Carbon Management (IRC-HTCM), King Fahd University of Petroleum & Minerals (KFUPM), Dhahran, 31261, Saudi Arabia.

Email: [tarek.kandiel@kfupm.edu.sa](mailto:tarek.kandiel@kfupm.edu.sa); [kandiel@science.sohag.edu.eg](mailto:kandiel@science.sohag.edu.eg); [asaadi@kfupm.edu.sa](mailto:asaadi@kfupm.edu.sa)

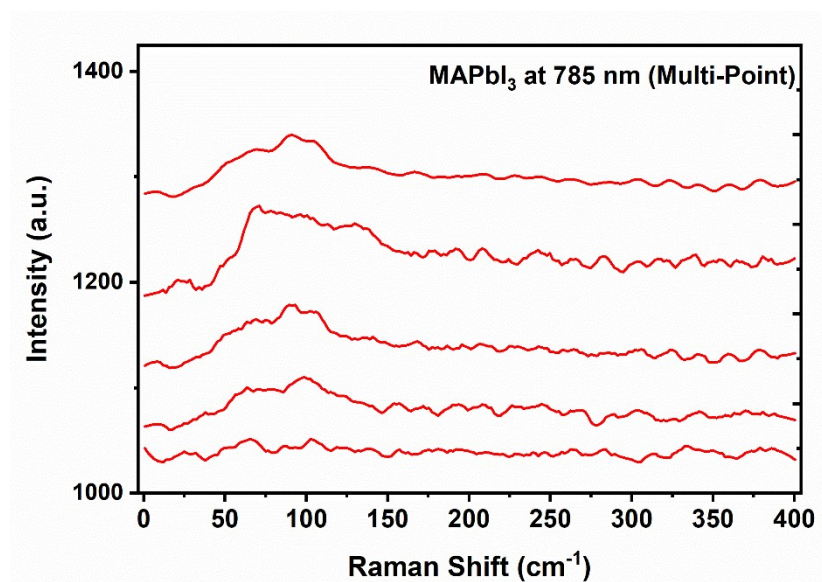

**Figure S1.** Raman spectra of MAPbI<sub>3</sub> crystals recorded at 785 nm excitation from multiple surface point positions, confirming Raman inactivity under non-resonant conditions, with only weak, broad bands (60-110 cm<sup>-1</sup>) attributed to disorder-activated modes.

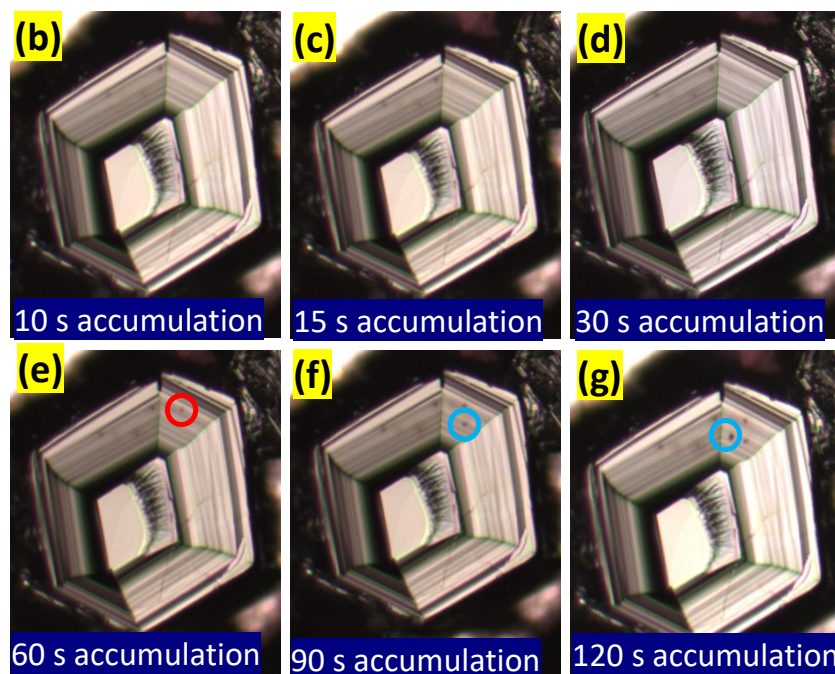

**Figure S2.** (b-g) Optical microscopic images of MAPbI<sub>3</sub> crystals at different acquisition times (10,15, 30, 60, 90, 120 s). Conditions: 600gr/mm grooving,10x focusing, and 532 nm laser excitation source.

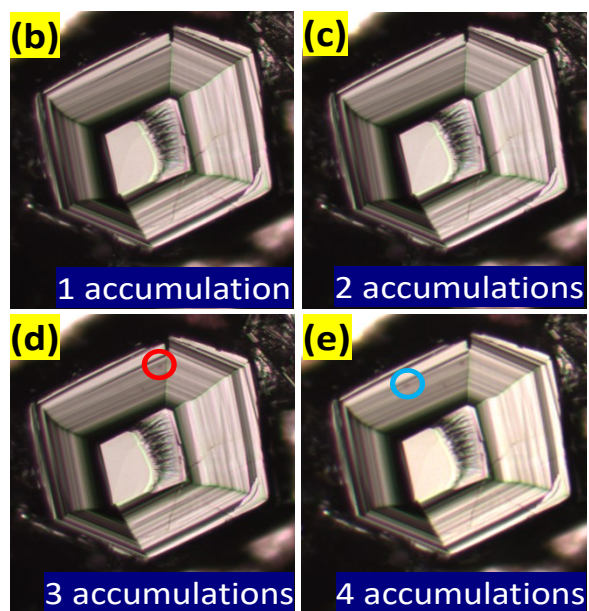

**Figure S3.** (b-e) Optical microscopic images of MAPbI<sub>3</sub> crystal at different accumulation frequencies (1, 2, 3, and 4). Conditions: 15 sec acquisition time, 600gr/mm grooving, 10x focusing, and 532 nm laser excitation source.

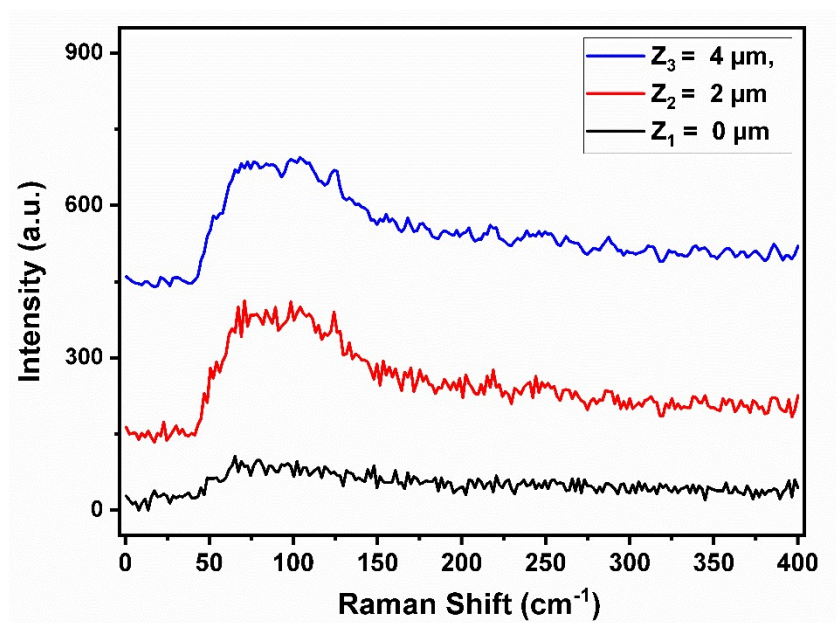

**Figure S4.** Depth-dependent (z-scan) Raman spectra of MAPbI<sub>3</sub> crystals recorded using 785 nm excitation (1.58 eV) at different focal depths ( $Z_1 = 0 \mu\text{m}$ ,  $Z_2 = 2 \mu\text{m}$ ,  $Z_3 = 4 \mu\text{m}$ )

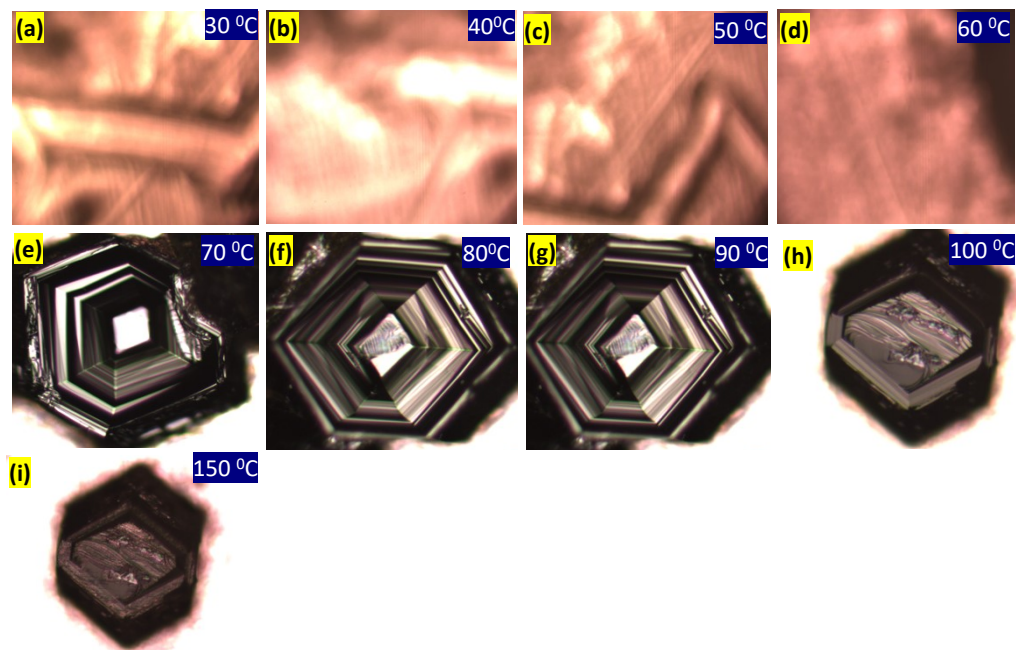

**Figure S5:** (a-h) Optical microscopic images taken while collecting the temperature-based Raman spectra of solvated MAPbI<sub>3</sub> were measured in an N<sub>2</sub> environment and are presented in Fig. 5.

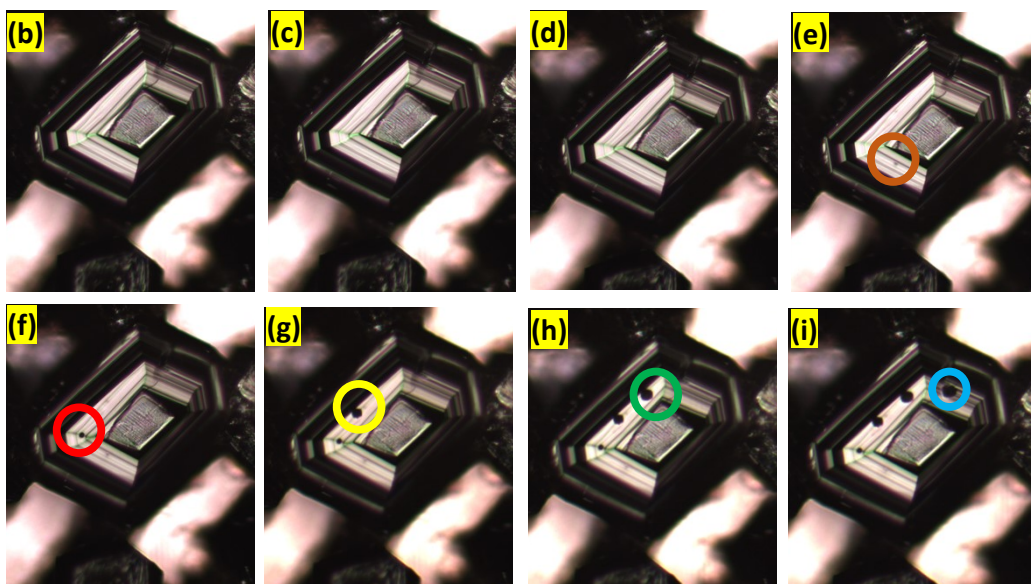

**Figure S6.** (b-i) Optical microscopic images of MAPbI<sub>3</sub> crystals at different laser power adjusted using different neutral density filters (ND 0.1 to 100 %) and a 10x lens. Conditions: 15 sec with 2-time acquisition, 600gr/mm grooving, 532 nm laser excitation source.



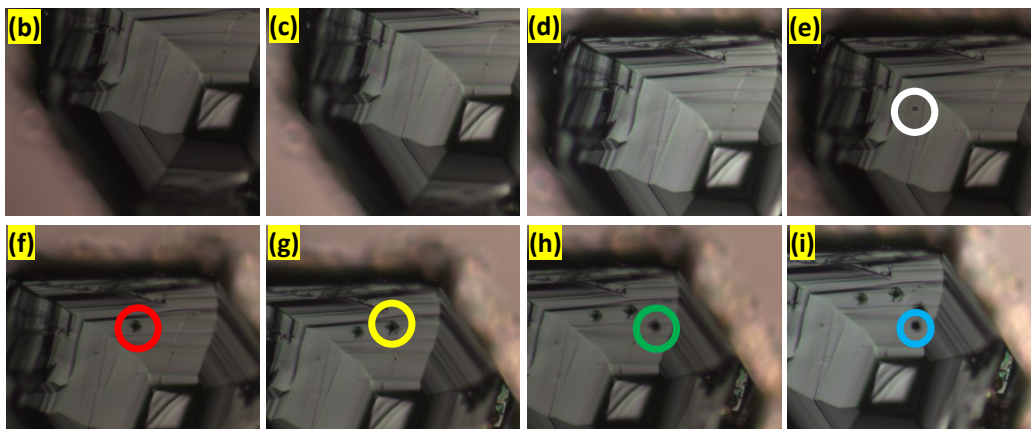

**Figure S7.** (b-i) optical microscopic images of MAPbI<sub>3</sub> crystals at different laser power adjusted using different neutral density filters (ND 0.1 to 100 %) and 50x lens, Conditions: 15 sec with 2-time acquisition, 600gr/mm grooving, 532 nm laser excitation source.
